1       **Title: Th17 cells provide direct protective effects that limit stomach parasite**  
2               **burden following orogastric mucosal *Trypanosoma cruzi* infection**

3

4               **Short title: Th17 cells protect against mucosal *T. cruzi* infection**

5

6 Catherine W. Cai<sup>1,2</sup>, Christopher S. Eickhoff<sup>1</sup>, Krystal A. Meza<sup>1</sup>, Jennifer R. Blase<sup>1,2,#a</sup>,

7 Rebecca E. Audette<sup>1</sup>, David H. Chan<sup>1</sup>, Kevin A. Bockerstett<sup>2</sup>, Richard J. DiPaolo<sup>2</sup>,

8 Daniel F. Hoft<sup>1,2\*</sup>

9

10 <sup>1</sup>Division of Infectious Diseases, Allergy and Immunology, Department of Internal

11 Medicine, Saint Louis University School of Medicine, Saint Louis, Missouri, United

12 States of America

13 <sup>2</sup>Department of Molecular Microbiology & Immunology, Saint Louis University School of

14 Medicine, Saint Louis, Missouri, United States of America

15

16 <sup>#a</sup> Current address: Department of Pediatrics, University of Michigan, Ann Arbor,

17 Michigan, United States of America

18

19 \* Corresponding author

20 E-mail: [daniel.hoft@health.slu.edu](mailto:daniel.hoft@health.slu.edu) (DFH)

21

22

23

## 24 **Abstract**

25 *Trypanosoma cruzi* is the intracellular parasite of Chagas disease, a chronic  
26 condition characterized by cardiac and gastrointestinal morbidity. Protective immunity  
27 requires CD4+ T cells, and Th1 cells and IFN- $\gamma$  are important players in host defense.  
28 More recently, Th17 cells and IL-17 have been shown to exert protective functions in  
29 systemic *T. cruzi* infection. However, it remains unclear whether Th17 cells and IL-17A  
30 protect against mucosal infection, which is an important cause of human outbreaks. We  
31 found that IL-17RA knock-out (KO) mice are highly susceptible to orogastric infection,  
32 indicating an important function for this cytokine in mucosal immunity to *T. cruzi*. To  
33 investigate the specific role of Th17 cells for mucosal immunity, we reconstituted RAG1  
34 KO mice with *T. cruzi*-specific T cell receptor transgenic Th17 cells prior to orogastric *T.*  
35 *cruzi* challenges. We found that Th17 cells provided protection against gastric mucosal  
36 *T. cruzi* infection, indicated by significantly lower stomach parasite burdens. *In vitro*  
37 macrophage infection assays revealed that protection by Th17 cells is reversed with IL-  
38 17A neutralization or loss of macrophage NADPH oxidase activity. Consistent with this,  
39 *in vivo*, mice lacking functional NADPH oxidase were not protected by Th17 cell  
40 transfer. These data are the first report that Th17 cells protect against mucosal *T. cruzi*  
41 infection, and identify a novel protective mechanism involving the induction of NADPH  
42 oxidase activity in macrophages by IL-17A. These studies provide important insights for  
43 Chagas vaccine development, and more broadly, increase our understanding of the  
44 diverse roles of Th17 cells in host defense.

45

46

## 47 **Introduction**

48           Chronic infection with the intracellular protozoan parasite *Trypanosoma cruzi*  
49 causes Chagas disease, a neglected tropical disease characterized by life-threatening  
50 cardiac and gastrointestinal pathology(1). The disease is endemic in Latin America with  
51 geographical spread into non-endemic areas, and it affects at least 8 million people(2).  
52 Infected reduviid “kissing bug” insects carry *T. cruzi* in their gastrointestinal tracts and  
53 deposit infectious parasites in their excreta after taking a blood meal. People become  
54 infected when parasite-containing excreta are accidentally ingested or inoculated into  
55 the eye or a break in the skin. Thus, the major routes of vector-borne transmission are  
56 mucosal and cutaneous.

57           During chronic *T. cruzi* infection, the parasite load is controlled but never  
58 completely eliminated. A robust T cell response is sufficient for parasite control in some  
59 models(3, 4), and lack of either CD4+ or CD8+ T cell responses increases susceptibility  
60 to infection(5-9). Among the CD4+ T cell subsets, Th1 cells have been demonstrated to  
61 protect against both systemic and mucosal infection(5, 10-12), while Th2 cells promote  
62 parasite persistence and mortality(12, 13). More recent studies have investigated the  
63 role of Th17 cells and IL-17A. We previously discovered using an adoptive cell transfer  
64 model that Th17 cells significantly reduce parasitemia and prevent mortality after a  
65 normally lethal challenge administered via subcutaneous injection of parasites (3).  
66 Other investigators have shown that mice deficient in IL-17A signaling due to genetic  
67 mutation of IL-17A (14) or its receptor(15), or through antibody neutralization(16), have  
68 increased susceptibility to an intraperitoneally administered *T. cruzi* challenge.

69           Despite evidence that IL-17A and Th17 cells protect against systemic parasite  
70 challenges, whether this type of response contributes to mucosal immunity is unknown.  
71 Orogastic infection has caused hundreds of outbreaks in humans(17-19). It has grown  
72 more common in recent years and is a leading route of transmission in some endemic  
73 areas(19). Oral ingestion is also considered to be a major route of transmission in other  
74 mammalian hosts such as domestic dogs, which are infected at high rates in endemic  
75 areas(20). Th17 cells are highly abundant at mucosal surfaces, especially in the  
76 intestinal gut, where they play a major role in homeostasis and immunity(21). Mainly  
77 through the secretion of IL-17A, these cells can recruit neutrophils, induce the  
78 expression of anti-microbial peptides, and upregulate factors that maintain epithelial  
79 integrity. These functions contribute to immunity in the intestinal mucosa(21) and may  
80 also be relevant for immunity in the gastric mucosa.

81           In this project, we investigated whether Th17 cells, previously demonstrated to  
82 confer immunity against systemic *T. cruzi* infection, can also drive immunity protective  
83 against mucosal infection. Ultimately, understanding of the full spectrum of functions of  
84 Th17 cells and IL-17A in *T. cruzi* infection will guide the development of vaccines  
85 inducing protective mucosal and systemic immunity.

86

## 87 **Results**

### 88 **IL-17A signaling is important for mucosal immunity to *T. cruzi* infection**

89           IL-17A is critical in systemic immunity against *T. cruzi* infection(14-16). To  
90 investigate how IL-17A functions in *T. cruzi* mucosal immunity, we performed orogastric  
91 infections in wild-type (WT) and IL-17RA knock-out (KO) BALB/c mice, which lack a

92 subunit of the heterodimeric receptor for IL-17A(21). Twelve days later, we performed  
93 hematoxylin and eosin staining of tissue sections taken where *T. cruzi* preferentially  
94 infects at the margo plicatus(22), the region of transition between the glandular corpus  
95 of the stomach and the non-glandular forestomach. At baseline, the stomachs of WT  
96 and IL-17RA KO mice were histologically similar, with the presence of well-differentiated  
97 glands (Supplemental Fig 1). After infection, only mild histological abnormalities were  
98 observed in WT mice (Fig 1A). However, infected IL-17RA KO mice exhibited  
99 pronounced inflammatory infiltrate and loss of specialized glandular cells representing  
100 atrophy(23), indicating increased susceptibility to gastric mucosal parasite challenge  
101 (Figs 1A and 1B). IL-17RA KO mice also had higher parasite burdens in the stomach  
102 and a greater proportion of infected spleen cells (Figs 1C and 1D), indicating  
103 comparably worse immune control. These data are the first evidence that IL-17  
104 signaling plays a critical role in protective gastric mucosal immunity to *T. cruzi* infection.

### 105 **Th17 cells can protect against gastric mucosal infection**

106 Th17 cells are major CD4+ T cell producers of IL-17A. To investigate the role of  
107 Th17 cells in gastric mucosal *T. cruzi* infection, we generated Th17 cells specific for *T.*  
108 *cruzi*. This was done via *in vitro* Th17 differentiation of CD4+ T cells with transgenic T  
109 cell receptors (TCR Tg) recognizing an immunodominant epitope of the *T. cruzi trans-*  
110 *sialidase* antigen(3). We have previously characterized the phenotype and persistence  
111 of these TCR Tg Th17 cells in adoptive transfer models(3), and cells were confirmed to  
112 express the canonical Th17 cell markers ROR $\gamma$ t and IL-17A prior to every transfer.

113 We transferred these TCR Tg Th17 cells into RAG1 KO mice lacking  
114 endogenous T cells, with or without *T. cruzi*-naïve polyclonal CD8+ T cells. Control

115 animals received CD8+ T cells alone or no T cell transfer. The following day, we  
116 induced stomach infection via oral gavage of parasites. On day 12 post-infection,  
117 previously identified as the time of peak parasite burden, we sacrificed the mice for  
118 quantification of parasite burden in the stomach using qPCR and in the spleen using  
119 parasite outgrowth assays (Fig 2A). Mice receiving Th17 cells with CD8+ T cells had  
120 significantly reduced *T. cruzi* DNA in the stomach compared to control mice (Fig 2B). In  
121 addition, these mice had a smaller proportion of infected spleen cells compared to  
122 control mice, indicating significantly improved overall control of the infection (Fig 2C).

123 We previously demonstrated that in systemic infection, co-transfer of CD8+ T  
124 cells is required for the protective effects of Th17 cells. Mechanistically, parasite-specific  
125 Th17 cells protected by providing help to CD8+ T cells via IL-21 signaling(3).  
126 Surprisingly, Th17 cells alone provided significant mucosal protection, and the addition  
127 of CD8+ T cells did not improve protection (Figs 2B and 2C). These data indicate that  
128 Th17-mediated mucosal protection operates via a different mechanism, involving direct  
129 protective functions rather than helper effects on CD8+ T cells.

130 Th1 cells are known to provide direct protective effects that can control *T. cruzi*  
131 infection independent of CD8+ T cells, primarily through IFN- $\gamma$ -mediated activation of  
132 macrophages(24). We next reconstituted RAG1 KO mice with either TCR Tg Th1 or  
133 Th17 cells to compare the direct protective effects of these CD4+ T cell subsets. Both  
134 Th1 and Th17 cells were able to confer direct protective effects against a gastric  
135 challenge, as indicated by low levels of parasite DNA in the stomach after infection (Fig  
136 2D). Th1 and Th17 cells similarly reduced the proportion of infected spleen cells  
137 compared to control mice given no T cell transfer (Fig 2E), indicating that both Th1 and

138 Th17 cells protect against a mucosal *T. cruzi* infection even in a CD8+ T cell and B cell  
139 deficient environment.

#### 140 **Th17 cells provide direct protective effects *in vitro* via IL-17A**

141 To investigate direct protective effects of Th17 cells, we infected macrophages  
142 with *T. cruzi in vitro*, and then co-cultured them with either parasite-specific Th1 or Th17  
143 cells before enumerating the number of infected macrophages arising after 2 days (Fig  
144 3A). Both Th1 or Th17 cells resulted in a significantly reduced number of infected cells  
145 (Fig 3B). Adding an anti-IL-17A neutralizing antibody partially reversed the protective  
146 effects of Th17 cells (Fig 3C), suggesting that the protection is cytokine-mediated.  
147 Consistent with this, treatment with IFN- $\gamma$  or IL-17A, representing the major cytokines  
148 produced by Th1 and Th17 cells, respectively, also significantly reduced the number of  
149 infected cells in both murine (Fig 3D) and human macrophages (Fig 3E). These data  
150 confirm that Th17 cells provide direct protective effects via IL-17A and suggest a similar  
151 effect may exist in humans.

#### 152 **IL-17A induces NADPH oxidase activity in infected macrophages**

153 Th1 cells prime macrophage activation for the killing of intracellular  
154 microorganisms through IFN- $\gamma$ -mediated induction of iNOS, which results in the  
155 generation of microbicidal nitric oxide (NO)(10, 24). We confirmed that treatment of  
156 infected BMDMs with IFN- $\gamma$  resulted in an increase in NO concentration (Fig 3F). In  
157 contrast, treatment with IL-17A had no effect on increasing NO levels over control cells  
158 (Fig 3F). Reactive oxygen species (ROS) are generated by NADPH oxidase during the  
159 phagocyte respiratory burst response, and similar to NO, they can inhibit microbial  
160 growth. To evaluate whether ROS were induced by IL-17A, we incubated IL-17A-treated

161 and infected BMDMs with DCFDA, a probe that can be oxidized into a fluorescent  
162 substrate. *T. cruzi* infection in the presence of IL-17A induced a 3.5-fold increase in the  
163 mean fluorescence intensity of oxidized DCFDA over uninfected cells, indicating a  
164 higher oxidation state under these conditions (Fig 3G). However, the amount of oxidized  
165 DCFDA did not increase among gp91phox KO cells lacking functional NADPH oxidase  
166 enzyme under the same conditions, reflecting the expected defect in ROS production  
167 (Fig 3G). Further, this deficiency of functional NADPH oxidase had no effect on IFN- $\gamma$ -  
168 mediated protection, but reversed IL-17A-mediated protection (Fig 3H). These data  
169 indicate that direct protection by Th17 cells requires IL-17A signaling and NADPH  
170 oxidase activity.

#### 171 **Th17 cells induce oxidation in mucosal immune cells *in vivo***

172 To determine whether parasite-specific Th17 cells given by adoptive transfer  
173 could be detected in the stomach, we recovered cells from the gastric mucosa of mice  
174 given no T cells or Th17 cells after orogastric infection with *T. cruzi*. We confirmed that  
175 parasite-specific Th17 cells were present in the gastric mucosa post-infection (Fig 4A).  
176 Proportions of other immune cell subsets, including neutrophils, which can be recruited  
177 by IL-17A, were not significantly altered compared to control mice receiving no T cell  
178 transfer (Fig 4A).

179 We next asked whether parasite-specific Th17 cells induced NADPH oxidase  
180 activity in the gastric mucosa during *T. cruzi* infection *in vivo*. We adoptively transferred  
181 Th17 cells into mice and, then orogastrically infected them and recovered gastric  
182 mucosal cells for DCFDA staining. We determined that macrophages and neutrophils  
183 recovered from the gastric mucosa of mice given Th17 cells had significantly higher



184 oxidation states compared to control mice (Fig 4B), indicating an increase in reactive  
185 oxygen species. These results are consistent with phagocytic cells being the primary  
186 cell types undergoing the respiratory burst response and support the hypothesis that  
187 Th17 cells protect against orogastric infection by inducing increased expression of ROS  
188 in certain cells.

### 189 **NADPH oxidase activity is required for Th17-mediated mucosal protection**

190 Based on the *in vitro* infection assays demonstrating protection by Th17 cells  
191 operates via secretion of IL-17A and induction of NADPH oxidase in target cells, we  
192 asked if these are also required for *in vivo* protection. We administered an anti-IL-17A  
193 neutralizing antibody every other day in Th17-reconstituted and orogastrically infected  
194 mice (Supplemental Fig 2). This partially reduced serum levels of IL-17A (Supplemental  
195 Fig 2A), but it did not reverse Th17-mediated protection (Supplemental Fig 2B), likely  
196 due to the incomplete abrogation of IL-17A activity (Supplemental Fig 2A).

197 To further study the role of NADPH oxidase *in vivo*, we transferred parasite-  
198 specific Th17 cells into RAG1 KO and gp91phox x RAG1 double KO (dKO) mice prior to  
199 orogastric challenge. While RAG1 KO mice had significantly improved resistance to  
200 orogastric *T. cruzi* infection following Th17 cell transfer (mean 2,783 parasite mEq per  
201 100ng gastric DNA with Th17 cell transfer, versus 12,548 without transfer,  $P < 0.005$ ),  
202 Th17 cells did not confer measurable protection in mice lacking functional NADPH  
203 oxidase (mean 12,690 parasite mEq per 100ng gastric DNA with Th17 cell transfer,  
204 versus 20,252 without transfer,  $P = 0.4304$ ). These data indicate a critical role for this  
205 enzyme in IL-17A-mediated immunity (Fig 5).

### 206 **Discussion**

207           Although Chagas disease is an important illness causing significant morbidity  
208 and mortality in the Western hemisphere, few truly effective treatments exist. Drugs are  
209 limited by side effects and poor efficacy during the chronic stage of infection(25), and no  
210 vaccines are being tested in humans. The development of an effective vaccine would be  
211 an economically sound approach (26) and requires a thorough understanding of the  
212 protective immune response to this parasite, including mucosal immunity.

213           Th17 cells are well-established as important players against various fungi and  
214 extracellular bacteria(21) but are only recently gaining recognition as effectors in the  
215 immune response to intracellular pathogens like *T. cruzi*. Several studies over the past  
216 decade have described a role for IL-17A in the protective response against systemic *T.*  
217 *cruzi* parasite infection in mice(14, 16), and more recent work suggests a protective role  
218 for this cytokine in human Chagas disease as well(27). However, none of these studies  
219 has specifically examined the role of IL-17A in mucosal immunity against *T. cruzi*.

220           In this study, we demonstrate for the first time that Th17 cells and IL-17A contribute  
221 immunity against a gastric mucosal *T. cruzi* infection. Although CD8+ T cells are critical  
222 for Th17-mediated protection in systemic infection (3), they are dispensable in mucosal  
223 immunity. Instead, Th17 cells provide direct protective effects via secretion of IL-17A  
224 and induction of NADPH oxidase. While systemic *T. cruzi* infection involves multiple  
225 tissues and requires CD8+ T cell responses, local direct protective effects of IL-17A  
226 may be sufficient in mucosal infection. In addition, in systemic infection models, Th17  
227 cells provided more protection against mortality compared to Th1 cells due to improved  
228 helper effects. However, protection by Th1 and Th17 cells was comparable at the  
229 gastric mucosa, where these cells act directly.

230 In summary, we identify a role for Th17 cells and IL-17A in mucosal immunity  
231 against *Trypanosoma cruzi* and we describe a novel protective mechanism of IL-17A  
232 against an intracellular pathogen. Th17 cells may have more broad protective functions  
233 than previously believed, and these studies in *T. cruzi* could also provide insights into  
234 infections with similar mucosally transmitted intracellular protozoa. Ultimately, these  
235 findings should be assessed for translational potential through studies targeting the  
236 induction of Th17 cells through mucosal vaccination, with the goal of reducing the  
237 significant morbidity and mortality associated with this disease.

238

## 239 **Materials and Methods**

240 **Mice.** *T. cruzi*-specific BALB/c mice containing a transgenic CD4+ TCR specific  
241 for p7, an immunodominant CD4 epitope of the trans-sialidase antigen, were generated  
242 in the Hoft laboratory as previously described(3). WT BALB/c mice (NCI Charles River  
243 Laboratories), RAG1 KO BALB/c mice (The Jackson Laboratory), IL-17RA KO BALB/c  
244 mice (Amgen), WT C57BL/6 (NCI Charles River), RAG1 KO C57BL/6 (The Jackson  
245 Laboratory), and B6.129S6-Cybbtm1Din/J mice lacking the gp91phox catalytic subunit  
246 of NADPH oxidase (gp91phox KO, The Jackson Laboratory) were obtained directly from  
247 the vendor or maintained as breeding colonies within the Hoft laboratory. Gp91phox KO  
248 mice were also bred to RAG1 KO C57BL/6 mice to generate RAG1 x gp91phox dKO  
249 C57BL/6 mice. All studies were approved by the Saint Louis University Institutional  
250 Animal Care and Use Committee (IACUC) under protocol #1106 and conducted in an  
251 AAALAC accredited facility at Saint Louis University. Euthanasia was performed using

252 CO2 narcosis according to the American Veterinary Medical Association guidelines on  
253 euthanasia.

254 **Parasites and challenges.** Tulahuèn strain parasites were maintained by *in vivo*  
255 passage through *Dipetalogaster maximus* insects and WT BALB/c mice and *in vitro*  
256 passage in LDNT+, an H<sub>2</sub>O-based medium containing Liver Digest Neutralized Tryptose  
257 broth (Oxford). Culture-derived metacyclic trypomastigotes (CMT) were generated by *in*  
258 *vitro* differentiation in supplemented Grace's insect medium (Sigma) and maintained in  
259 a 26°C parasite incubator. For orogastric infections, mice were fasted for three hours  
260 and then fed 500 µl of a 1.5% sodium bicarbonate solution using a 22-gauge animal  
261 feeding needle, followed by 1 x 10<sup>7</sup> *T. cruzi* CMT parasites in 100 µl of 1% glucose in  
262 phosphate buffered saline (PBS). Extent of infection was assessed via quantification of  
263 parasite load in the stomach and spleen. Because orogastrically infected mice do not  
264 typically mount very high blood parasite burdens compared to systemically infected  
265 mice or die due to orogastric infection, these parameters were not routinely measured in  
266 our study.

267 **Parasite DNA qPCR:** Twelve days after orogastric infection, stomachs were  
268 dissected, cut along the greater curvature, rinsed in PBS to remove food contents, and  
269 minced with scissors. DNA was extracted from stomach tissue using DNeasy Blood and  
270 Tissue kits according to the manufacturer's instructions (Qiagen). Primers and TaqMan  
271 probes specific for *T. cruzi* genomic DNA were used to measure parasite load in the  
272 stomach as previously described (28). When histological analyses were performed in  
273 the same experiment, the stomachs were cut along both curvatures and dorsal portions  
274 used for qPCR.

275           **Histology.** Longitudinal strips 2-3 mm in width were cut from the esophageal to  
276 the pyloric ends of the ventral stomach, placed between pre-wetted foam pads in biopsy  
277 cassettes (Leica), and fixed by submersion in 10% neutral buffered formalin. Several  
278 hours later, the tissue was embedded, sectioned, affixed to slides and stained with  
279 hematoxylin and eosin at the Saint Louis University Research and Histology Microscopy  
280 Core. Images were acquired on an Olympus BX41 or Leica epifluorescent microscope.  
281 Inflammation scores were assigned according to a qualitative 0-4 scale by a blinded  
282 evaluator based on a scoring system adapted from Rogers et al(29). Briefly,  
283 inflammation was scored based upon the presence of leukocytes and the extent of their  
284 infiltration into the gastric mucosa. A score of 0 would indicate only the number of  
285 leukocytes present in the tissue at baseline (i.e. in a normal uninfected mouse with no  
286 inflammation), while a score of 4 indicates severe transmural inflammation with the  
287 presence of numerous infiltrating leukocytes.

288           **Generation of Th1 and Th17 cells:** *T. cruzi*-specific Th1 and Th17 cells were  
289 generated *in vitro* as previously described (3). Briefly, TCR Tg CD4+ T cells were  
290 stimulated with irradiated, cognate peptide-pulsed dendritic cells in the presence of  $\alpha$ -IL-  
291 4 and IL-12 (to generate Th1 cells), or  $\alpha$ -IL-4,  $\alpha$ -IFN- $\gamma$ , IL-6, TGF- $\beta$ , and IL-23 (to  
292 generate Th17 cells). Media was refreshed on days 3 and 6 with IL-2 for Th1 cells or IL-  
293 23 for Th17 cells. The cells underwent two rounds of this differentiation (re-stimulation  
294 with peptide-pulsed APCs on day 7 followed by maintenance cytokines on days 10 and  
295 13). Differentiation was confirmed by intracellular cytokine staining (ICS) for  
296 transcription factors and cytokines, and the cells were used on day 14. The phenotypes  
297 and stability of these Th1 and Th17 cells is previously documented(3).

298           **Flow cytometry and intracellular cytokine staining (ICS).** To obtain gastric  
299 mucosal immune cells, stomachs were dissected open, a syringe needle was  
300 introduced into the mucosal layers, and the region flushed with large volumes of media.  
301 The recovered cells were cultured with 1  $\mu$ l/ml of GolgiPlug containing monensin (BD  
302 Pharmingen) and 0.67  $\mu$ l/ml of GolgiStop containing Brefeldin A (BD Pharmingen) for 3  
303 hours at 37°C. Cells were then stained with Live Dead fixable aqua, followed by surface  
304 antibodies directed against CD3, CD4, CD11b, CD11c, Ly6G, F4/80, NKp46 (all BD or  
305 eBiosciences). Cells were fixed and permeabilized for intracellular cytokine staining  
306 using a Foxp3 transcription buffer staining set (eBiosciences). Cells were washed with  
307 1% FBS in Dulbecco's PBS between all steps. All incubations were performed for 30  
308 minutes at 4°C. For oxidation staining, cells were incubated for 20 minutes at 37°C with  
309 100 nM of H<sub>2</sub>DCFDA (Invitrogen) after surface staining. All samples were acquired on a  
310 BD LSRII flow cytometer at the Saint Louis University flow cytometry core facility and  
311 analyzed on FlowJo software (Treestar, Inc.).

312           **Splenic parasite outgrowth assay:** Total spleen cells were mechanically  
313 isolated from dissected spleens 12 days after orogastric infection. Spleen cells were re-  
314 suspended in LDNT+ parasite medium, plated in a limiting dilution fashion in 96-well  
315 plates, and incubated in a 26°C parasite incubator. One month later, all wells were  
316 examined for live parasites. The last well with parasite outgrowth was used to estimate  
317 the number of parasites per million cells (e.g., live parasites emerging from 100 plated  
318 cells = at least 1 parasite per 100 cells) (28). Because a single cell suspension can be  
319 obtained from the spleen, this method was selected over qPCR for its ability to quantify

320 the presence of live parasites, though it may underestimate the true burden due to the  
321 detection of only parasites that can differentiate into trypomastigotes.

322 **Generation of peritoneal exudate macrophages (PEMs), bone-marrow  
323 derived macrophages (BMDMs), and human monocyte-derived macrophages:**

324 PEMs were generated from BALB/c strain mice, and BMDMs were generated from  
325 C57BL/6 strain mice. For PEMs, mice were injected intraperitoneally with 100 µg of  
326 concanavalin A (Sigma). PEMs were recovered 3-4 days later via peritoneal lavage  
327 using a syringe and needle. To generate BMDM, bone marrow cells harvested from  
328 mouse femurs were plated in supplemented RPMI medium with 20 ng/ml M-CSF  
329 (eBioscience), refreshed on day 3. BMDMs were harvested for use on day 7. For  
330 human monocyte-derived macrophages, peripheral blood mononuclear cells were  
331 cultured in 96-well plates for 7 days to induce maturation. Adherent cells were removed  
332 and re-plated in 8-well chamber slides (Lab-Tek) for infection assays.

333 ***In vitro* infection assay:** Macrophages were plated at 200,000 cells/well of 8-  
334 well chamber slides and infected with CMT (MOI=10). After 3 hours, extracellular  
335 parasites were removed by repeated washing. In some experiments, macrophages  
336 were co-cultured with purified recombinant murine or human IFN-γ (Genentech) at 1000  
337 U/ml or IL-17A (R&D) at 100 ng/ml, or an anti-IL-17A neutralizing antibody (TC11-  
338 18H10, BD Pharmingen) was added at a concentration of 10 µg/ml. Nitric oxide  
339 concentrations in supernatants were measured using the Griess Reagent System  
340 (Promega). Slides were stained with Diff-Quik (IMEB, Inc.) after 2 days, and infected  
341 cells were enumerated microscopically.

342 ***In vivo* IL-17A neutralization:** Mice were given 100 µg of an anti-IL-17A  
343 neutralizing antibody (17F3, Bio X Cell) or an IgG1 isotype control antibody (MOPC-21,  
344 Bio X Cell) every 2 days by intraperitoneal injection. Serum IL-17A levels were analyzed  
345 via Mouse IL-17A ELISA MAX Standard kits (BD).

346 **Statistics:** All analyses were performed in Prism version 8 (GraphPad Software)  
347 using a significance level of 5%.

348

## 349 **Acknowledgements**

350 The authors thank Jennifer Franey for her assistance with animal care and handling;  
351 Joy Eslick and Sherri Koehm for their assistance with flow cytometry; and Grant Kolar,  
352 Barbara Nagel and Caroline Murphy for their assistance with histology and microscopy.  
353 We thank Amgen for the provision of IL-17RA KO mice received under a material  
354 transfer agreement.

355

## 356 **Author contributions**

357 **Conceptualization:** CWC, CSE, DFH

358 **Formal analysis:** CWC, CSE, KAM, JRB, REA, DHC, KAB, DFH

359 **Funding acquisition:** DFH, CWC

360 **Investigation:** CWC, CSE, KAM, JRB, REA, DHC, KAB

361 **Methodology:** CWC, CSE, JRB, KAB, RJD, DFH

362 **Supervision:** DFH

363 **Validation:** CWC, CSE, KAM, JRB, REA, DHC

364 **Visualization:** CWC



365 **Writing – original draft:** CWC

366 **Writing – revising & editing:** all authors

367

368

## 369 **Competing interests**

370 The authors have declared that no competing interests exist.

371

372

## 373 **References**

374

- 375 1. Rassi A, Jr., Rassi A, Marin-Neto JA. Chagas disease. *Lancet*. 2010;375(9723):1388-402.
- 376 2. Bern C, Montgomery SP. An estimate of the burden of Chagas disease in the United  
377 States. *Clin Infect Dis*. 2009;49(5):e52-e4.
- 378 3. Cai CW, Blase JR, Zhang X, Eickhoff CS, Hoft DF. Th17 Cells Are More Protective Than Th1  
379 Cells Against the Intracellular Parasite *Trypanosoma cruzi*. *PLoS Pathog*. 2016;12(10):e1005902.
- 380 4. Sullivan NL, Eickhoff CS, Sagartz J, Hoft DF. Deficiency of Antigen-Specific B Cells Results  
381 in Decreased *Trypanosoma cruzi* Systemic but Not Mucosal Immunity Due to CD8 T Cell  
382 Exhaustion. *J Immunol*. 2015;194(15):1806-18.
- 383 5. Hoft DF, Eickhoff CS. Type 1 immunity provides both optimal mucosal and systemic  
384 protection against a mucosally invasive, intracellular pathogen. *Infect Immun*. 2005;73(8):4934-  
385 40.
- 386 6. Tarleton RL, Sun J, Zhang L, Postan M. Depletion of T-cell subpopulations results in  
387 exacerbation of myocarditis and parasitism in experimental Chagas' disease. *Infect Immun*.  
388 1994;62(5):1820-9.
- 389 7. Tarleton RL, Koller BH, Latour A, Postan M. Susceptibility of beta 2-microglobulin-  
390 deficient mice to *Trypanosoma cruzi* infection. *Nature*. 1992;356(6367):338-40.
- 391 8. Tarleton RL, Grusby MJ, Postan M, Glimcher LH. *Trypanosoma cruzi* infection in MHC-  
392 deficient mice: further evidence for the role of both class I- and class II-restricted T cells in  
393 immune resistance and disease. *Int Immunol*. 1996;8(1):13-22.
- 394 9. Tarleton RL. Depletion of CD8<sup>+</sup> T cells increases susceptibility and reverses vaccine-  
395 induced immunity in mice infected with *Trypanosoma cruzi*. *J Immunol*. 1990;144(2):717-24.
- 396 10. Hoft DF, Schnapp AR, Eickhoff CS, Roodman ST. Involvement of CD4(+) Th1 cells in  
397 systemic immunity protective against primary and secondary challenges with *Trypanosoma*  
398 *cruzi*. *Infect Immun*. 2000;68(1):197-204.

- 399 11. Hoft DF, Eickhoff CS. Type 1 immunity provides optimal protection against both mucosal  
400 and systemic *Trypanosoma cruzi* challenges. *Infect Immun*. 2002;70(12):6715-25.
- 401 12. Kumar S, Tarleton RL. Antigen-specific Th1 but not Th2 cells provide protection from  
402 lethal *Trypanosoma cruzi* infection in mice. *J Immunol*. 2001;166(7):4596-603.
- 403 13. Lopes MF, Nunes MP, Henriques-Pons A, Giese N, Morse HC, 3rd, Davidson WF, et al.  
404 Increased susceptibility of Fas ligand-deficient gld mice to *Trypanosoma cruzi* infection due to a  
405 Th2-biased host immune response. *Eur J Immunol*. 1999;29(1):81-9.
- 406 14. Miyazaki Y, Hamano S, Wang S, Shimanoe Y, Iwakura Y, Yoshida H. IL-17 is necessary for  
407 host protection against acute-phase *Trypanosoma cruzi* infection. *J Immunol*.  
408 2010;185(2):1150-7.
- 409 15. Tosello Boari J, Amezcua Vesely MC, Bermejo DA, Ramello MC, Montes CL, Cejas H, et al.  
410 IL-17RA signaling reduces inflammation and mortality during *Trypanosoma cruzi* infection by  
411 recruiting suppressive IL-10-producing neutrophils. *PLoS Pathog*. 2012;8(4):e1002658.
- 412 16. da Matta Guedes PM, Gutierrez FR, Maia FL, Milanezi CM, Silva GK, Pavanelli WR, et al.  
413 IL-17 produced during *Trypanosoma cruzi* infection plays a central role in regulating parasite-  
414 induced myocarditis. *PLoS Negl Trop Dis*. 2010;4(2):e604.
- 415 17. Nobrega AA, Garcia MH, Tatto E, Obara MT, Costa E, Sobel J, et al. Oral transmission of  
416 Chagas disease by consumption of acai palm fruit, Brazil. *Emerg Infect Dis*. 2009;15(4):653-5.
- 417 18. Alarcon de Noya B, Diaz-Bello Z, Colmenares C, Ruiz-Guevara R, Mauriello L, Zavala-  
418 Jaspe R, et al. Large urban outbreak of orally acquired acute Chagas disease at a school in  
419 Caracas, Venezuela. *J Infect Dis*. 2010;201(9):1308-15.
- 420 19. Shikanai-Yasuda MA, Carvalho NB. Oral transmission of Chagas disease. *Clin Infect Dis*.  
421 2012;54(6):845-52.
- 422 20. Montenegro VM, Jimenez M, Dias JC, Zeledon R. Chagas disease in dogs from endemic  
423 areas of Costa Rica. *Mem Inst Oswaldo Cruz*. 2002;97(4):491-4.
- 424 21. Korn T, Bettelli E, Oukka M, Kuchroo VK. IL-17 and Th17 Cells. *Annu Rev Immunol*.  
425 2009;27:485-517.
- 426 22. Hoft DF, Farrar PL, Kratz-Owens K, Shaffer D. Gastric invasion by *Trypanosoma cruzi* and  
427 induction of protective mucosal immune responses. *Infect Immun*. 1996;64(9):3800-10.
- 428 23. Fox JG, Wang TC. Inflammation, atrophy, and gastric cancer. *J Clin Invest*.  
429 2007;117(1):60-9.
- 430 24. Rodrigues MM, Ribeiro M, Boscardin SB. CD4 Th1 but not Th2 clones efficiently  
431 activate macrophages to eliminate *Trypanosoma cruzi* through a nitric oxide dependent  
432 mechanism. *Immunol Lett*. 2000;73(1):43-50.
- 433 25. Pinazo MJ, Munoz J, Posada E, Lopez-Chejade P, Gallego M, Ayala E, et al. Tolerance of  
434 benzimidazole in treatment of Chagas' disease in adults. *Antimicrob Agents Chemother*.  
435 2010;54(11):4896-9.
- 436 26. Lee BY, Bacon KM, Connor DL, Willig AM, Bailey RR. The potential economic value of a  
437 *Trypanosoma cruzi* (Chagas disease) vaccine in Latin America. *PLoS Negl Trop Dis*.  
438 2010;4(12):e916.
- 439 27. Magalhaes LM, Villani FN, Nunes Mdo C, Gollob KJ, Rocha MO, Dutra WO. High  
440 interleukin 17 expression is correlated with better cardiac function in human Chagas disease. *J*  
441 *Infect Dis*. 2013;207(4):661-5.

442 28. Hoft DF, Farrar PL, Kratz-Owens K, Shaffer D. Gastric invasion by *Trypanosoma cruzi* and  
443 induction of protective mucosal immune responses. *Infect Immun.* 1996;64(9):3800-10.

444 29. Rogers AB, Taylor NS, Whary MT, Stefanich ED, Wang TC, Fox JG. Helicobacter pylori but  
445 not high salt induces gastric intraepithelial neoplasia in B6129 mice. *Cancer Res.*  
446 2005;65(23):10709-15.

447

448

## 449 **FIGURE LEGENDS**

### 450 **Fig 1. IL-17A signaling is required for mucosal immunity against gastric *T. cruzi***

451 **infection.** WT and IL-17RA KO mice were orogastrically infected with *T. cruzi* parasites,  
452 then sacrificed for tissue studies 12 days later. (A) Hematoxylin and eosin staining of  
453 stomach tissue sections taken near the margo plicatus reveals greater histological  
454 disturbances and inflammation in IL-17RA KO mice. Arrows indicate areas of immune  
455 cell infiltrate, and brackets capture areas with loss of specialized cells (e.g. chief cells)  
456 at the bases of the glands (B) IL-17RA KO mice had higher inflammation scores in the  
457 gastric mucosa, based on the extent of mononuclear cell infiltrate. (C-D) IL-17RA KO  
458 mice had higher parasite DNA levels in stomach as measured by qPCR (C), and greater  
459 frequencies of infected splenocytes (D), reflecting decreased control of infection.

460 \*\* $p < 0.01$ , \* $p < 0.05$  by two-tailed Student t test compared to WT mice.

461

### 462 **Fig 2. Th17 cells can provide direct protection against *T. cruzi* gastric mucosal**

463 **infection.** (A) RAG1 KO BALB/c mice were given various combinations of cells by  
464 adoptive transfer, orogastrically infected with *T. cruzi* parasites the following day, then  
465 sacrificed 12 days post-infection for studies of tissue parasite burden. (B-C) Mice given  
466 parasite-specific Th17 cells before challenge had decreased parasite DNA burdens in  
467 the stomach measured by qPCR (B) and a smaller frequency of infected splenocytes

468 measured by limiting dilution parasite outgrowth assay (C). The addition of CD8+ T cells  
469 did not significantly improve this Th17-mediated protection (B-C). (D) Both Th1 and  
470 Th17 cells significantly lowered stomach parasite burdens arising after mucosal  
471 infection. (E) Th1 cells and Th17 cells comparably decreased the burden of infection in  
472 the spleen. \*\* $p < 0.01$ , \* $p < 0.05$  by two-tailed Student t test compared to CD8 only group  
473 (B) or no tx group (C-E). Results are representative of two separate experiments.

474

475 **Fig 3. Th17 cells and IL-17A alone can inhibit *T. cruzi* intracellular growth in**  
476 **macrophages *in vitro* by inducing NADPH oxidase activity.** (A) Macrophages were  
477 infected *in vitro* with *T. cruzi* parasites and co-cultured with T cells or cytokines. The  
478 number of infected macrophages was counted after 2 days. (B) The addition of either  
479 parasite-specific Th1 or Th17 cells reduced the number of infected cells. (C) The  
480 protective action of Th17 cells was reduced in the presence of an anti-IL-17A  
481 neutralizing antibody, indicating a cytokine-mediated effect. (D-E) IFN- $\gamma$  or IL-17A  
482 treatment also decreased the number of infected cells among both murine (D) and  
483 human (E) macrophages. (F) Treatment of infected macrophages with IFN- $\gamma$ , but not IL-  
484 17A, induced expression of nitric oxide. (G) The mean fluorescence intensity (MFI) of  
485 oxidized DCFDA, a measure of intracellular ROS, increased approximately 3.5-fold with  
486 *T. cruzi* infection and IL-17A treatment in WT macrophages, but not gp91phox KO  
487 macrophages. (H) IFN- $\gamma$  treatment could protect both WT and gp91phox KO  
488 macrophages, while IL-17A was only able to significantly reduce the number of infected  
489 cells among WT macrophages, indicating that functional NADPH oxidase is required for  
490 IL-17A-mediated protection. Experiments in panels B-F were performed using BALB/c

491 mice; those in panels G-H were performed in C57BL/6 background mice. \*\*\*\* $p < 0.0001$ ,  
492 \*\*\* $p < 0.001$ , \*\* $p < 0.01$ , \* $p < 0.05$  by two-tailed Student t test compared to medium alone.  
493 Results are representative of multiple separate experiments.

494

495 **Fig 4. Th17 cells traffic to the gastric mucosa and induce increased expression of**

496 **intracellular ROS in macrophages.** RAG1 KO BALB/c mice were reconstituted with

497 Th17 cells and orogastrically infected with *T. cruzi* the next day. Twelve days after

498 infection, mice were sacrificed and immune cells were isolated from the gastric mucosa

499 for flow cytometric analysis. (A) CD4<sup>+</sup> T cells were recovered from the gastric mucosa

500 of mice reconstituted with Th17 cells, demonstrating that these cells migrated to the site

501 of infection. No significant differences in proportions of other immune cell subsets were

502 detected between mice given Th17 cells or not. (B) A significantly higher oxidation state

503 was observed in gastric mucosal macrophages and neutrophils recovered from mice

504 given Th17 cell adoptive transfer compared to controls.  $n = 3/\text{group}$ , \* $p < 0.05$  by two-

505 tailed Student t test compared to mice given no T cell transfer. Cells were defined by the

506 following surface markers: F4/80<sup>+</sup> (macrophages), CD11b<sup>+</sup>Ly6G<sup>+</sup> (neutrophils), CD3<sup>+</sup>

507 (CD4<sup>+</sup> T cells), CD3-NKp46<sup>+</sup> (NK cells), Live/Dead aqua<sup>-</sup> (all live cells), EpCAM<sup>+</sup>

508 (epithelial cells).

509

510 **Fig 5. Th17 cells cannot protect in the absence of functional NADPH oxidase.**

511 RAG1 KO mice and gp91phox x RAG1 dKO C57BL/6 mice lacking functional NADPH

512 oxidase were given parasite-specific Th17 cells or not, orogastrically challenged with *T.*

513 *cruzi* the next day, then sacrificed for tissue studies 12 days after infection. Only RAG1

514 KO mice and not gp91phox x RAG1 dKO mice were protected from orogastric *T. cruzi*  
515 infection by parasite-specific Th17 cells, as indicated by no significant decrease in  
516 stomach parasite DNA load. \* $p < 0.05$  by two-tailed Student t test. Results depict pooled  
517 data from three independent experiments.

518

519 **Supplemental Fig 1. Stomachs of WT and IL-17RA KO BALB/c mice are similar at**  
520 **baseline.** Prior to infection, both WT (A) and IL-17RA KO (B) mice demonstrated the  
521 presence of well-differentiated gastric glands and no significant immune cell infiltrate in  
522 the stomach mucosa.

523

524 **Supplemental Fig 2. IL-17A neutralization does not reverse protection by Th17**  
525 **cells *in vivo*.** RAG1 KO BALB/c mice reconstituted with parasite-specific Th17 cells  
526 were orogastrically infected with *T. cruzi* the next day and treated with an anti-IL-17A  
527 neutralizing antibody or an isotype control antibody every other day until sacrifice on  
528 day 12 post-infection for tissue studies. (A) Pooled sera of mice treated with anti-IL-17A  
529 show reduced but not abolished serum IL-17A. (B) Treatment with anti-IL-17A had no  
530 effect on Th17-mediated suppression of gastric parasite burden after orogastric  
531 infection.



Figure 1

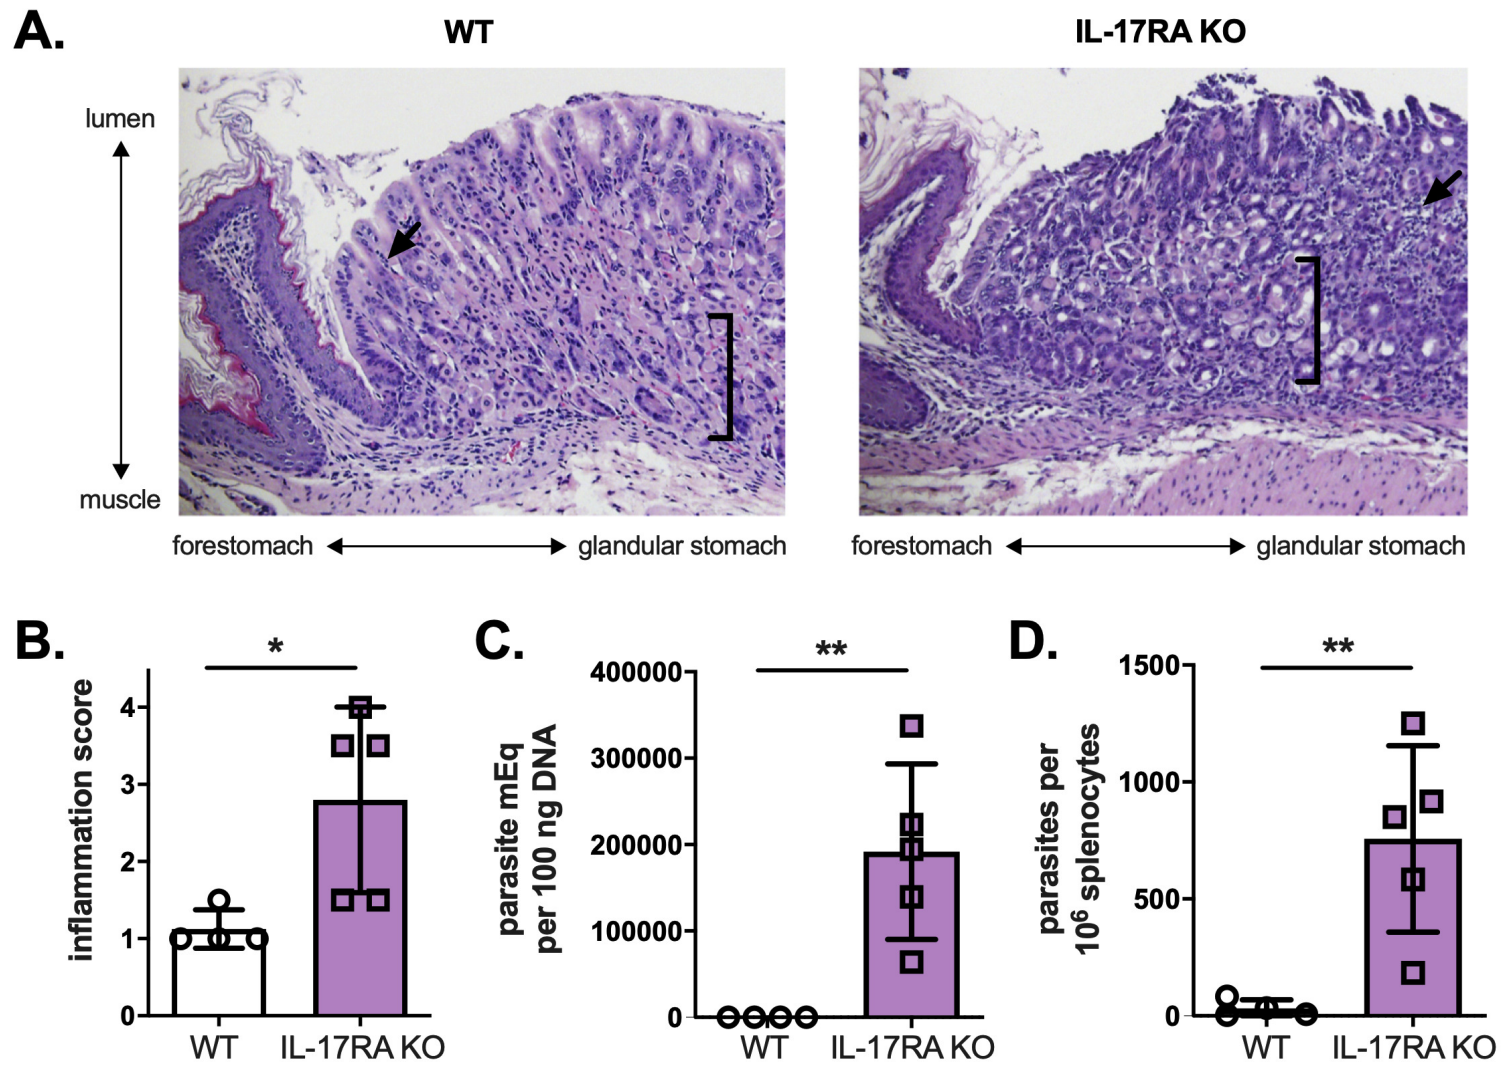

Figure 2

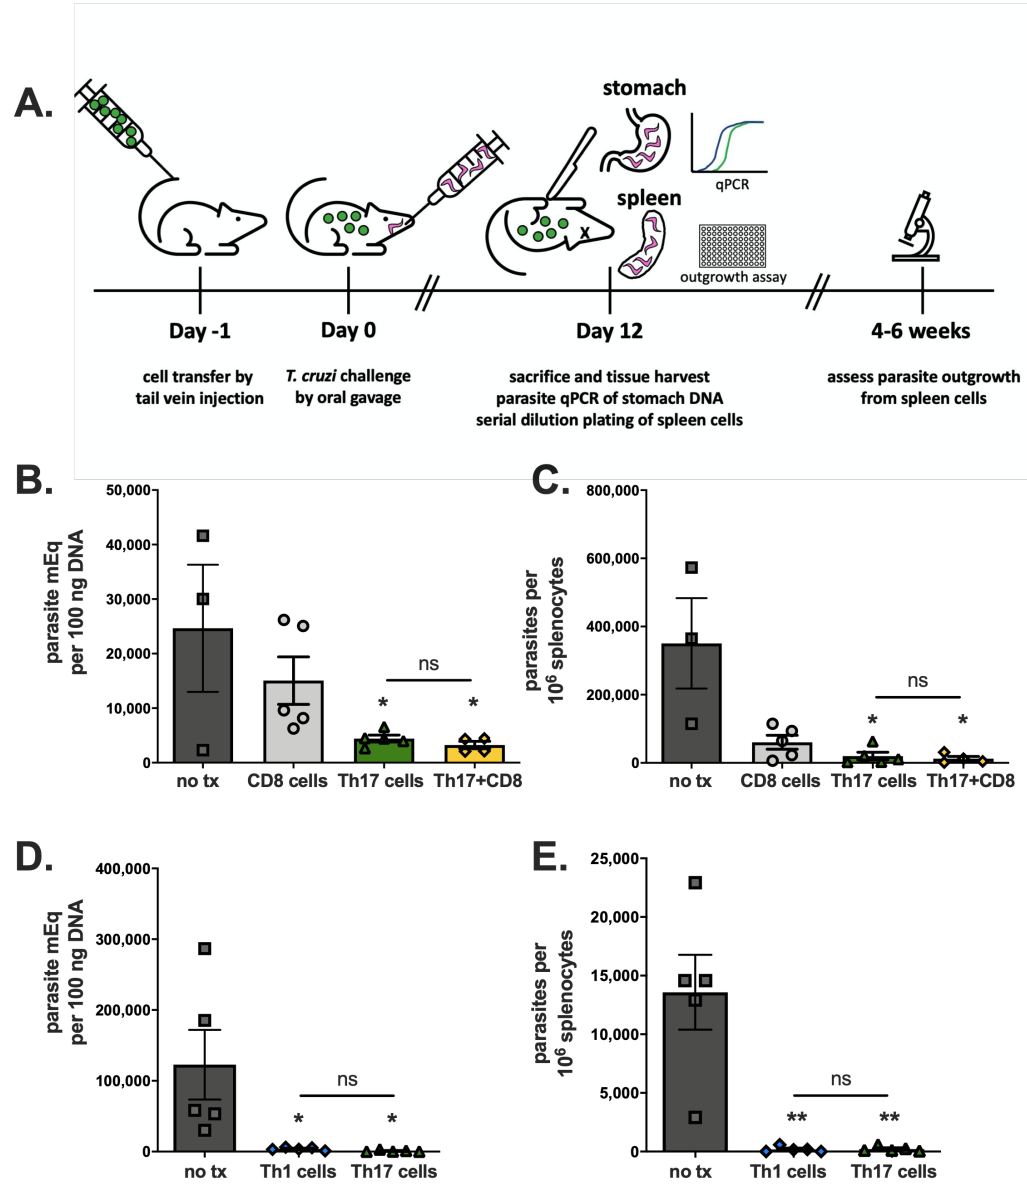



Figure 3

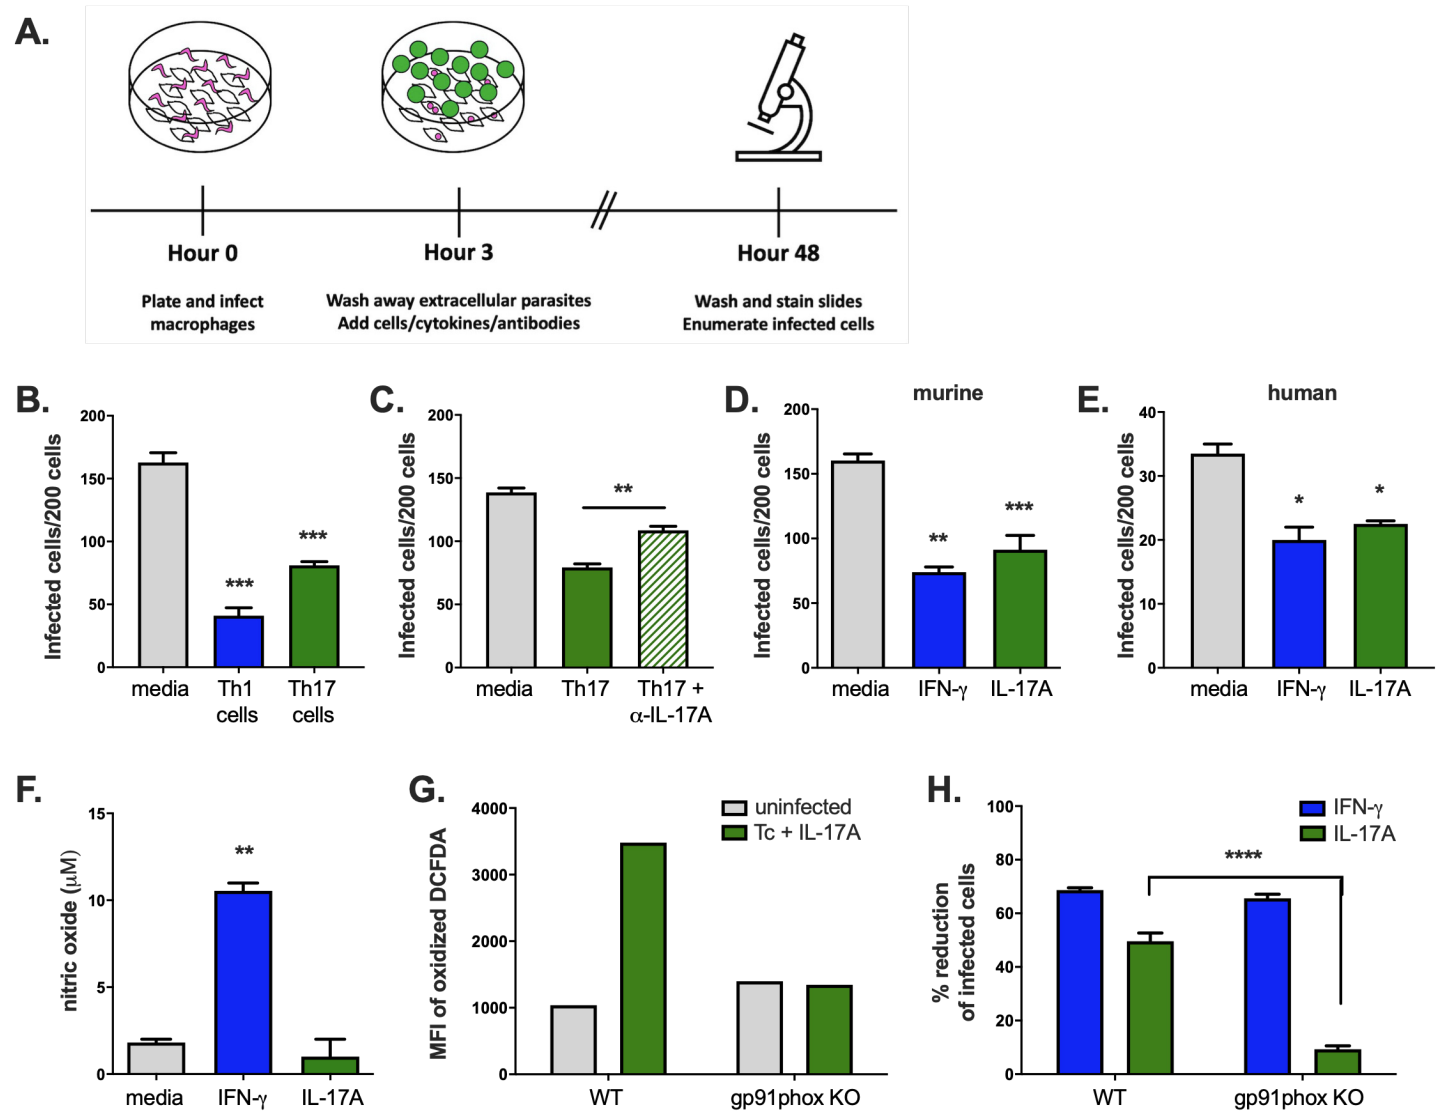

Figure 4

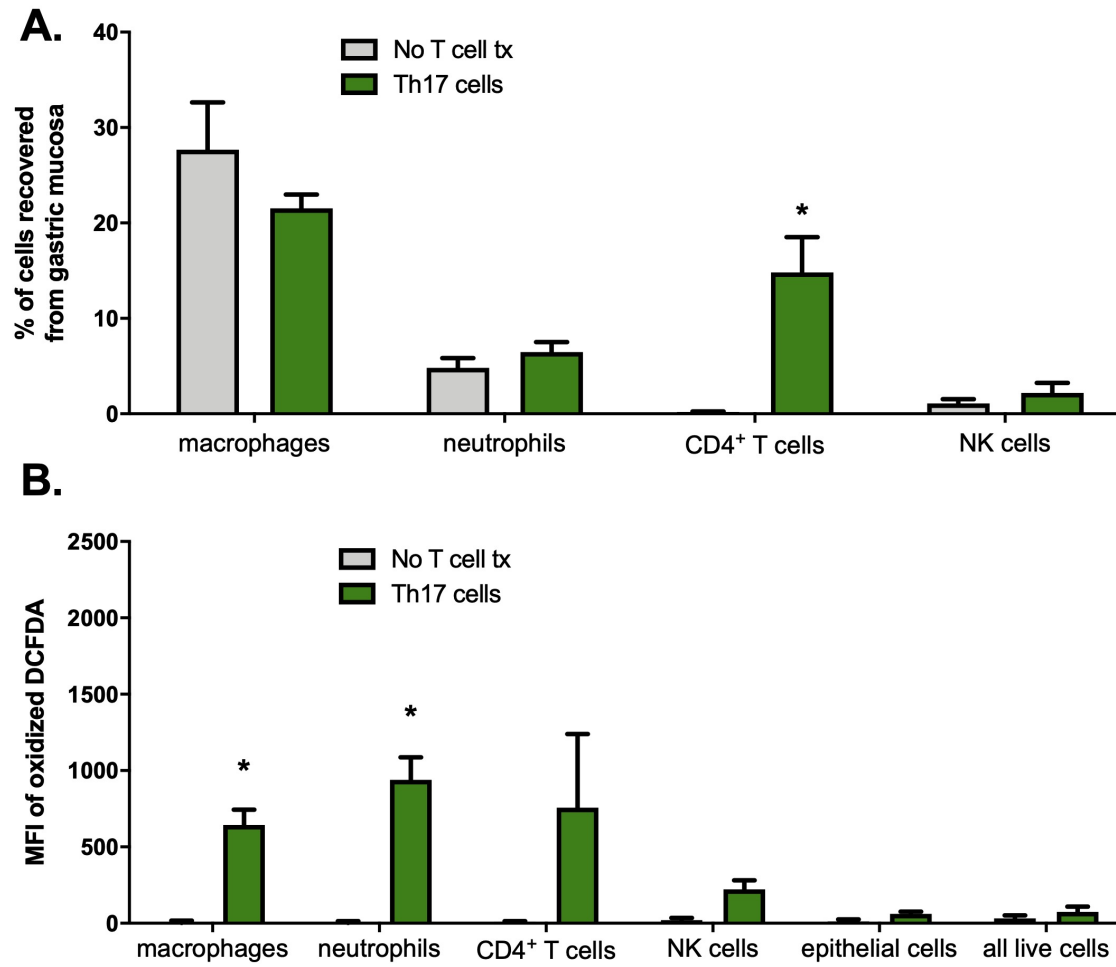

Figure 5

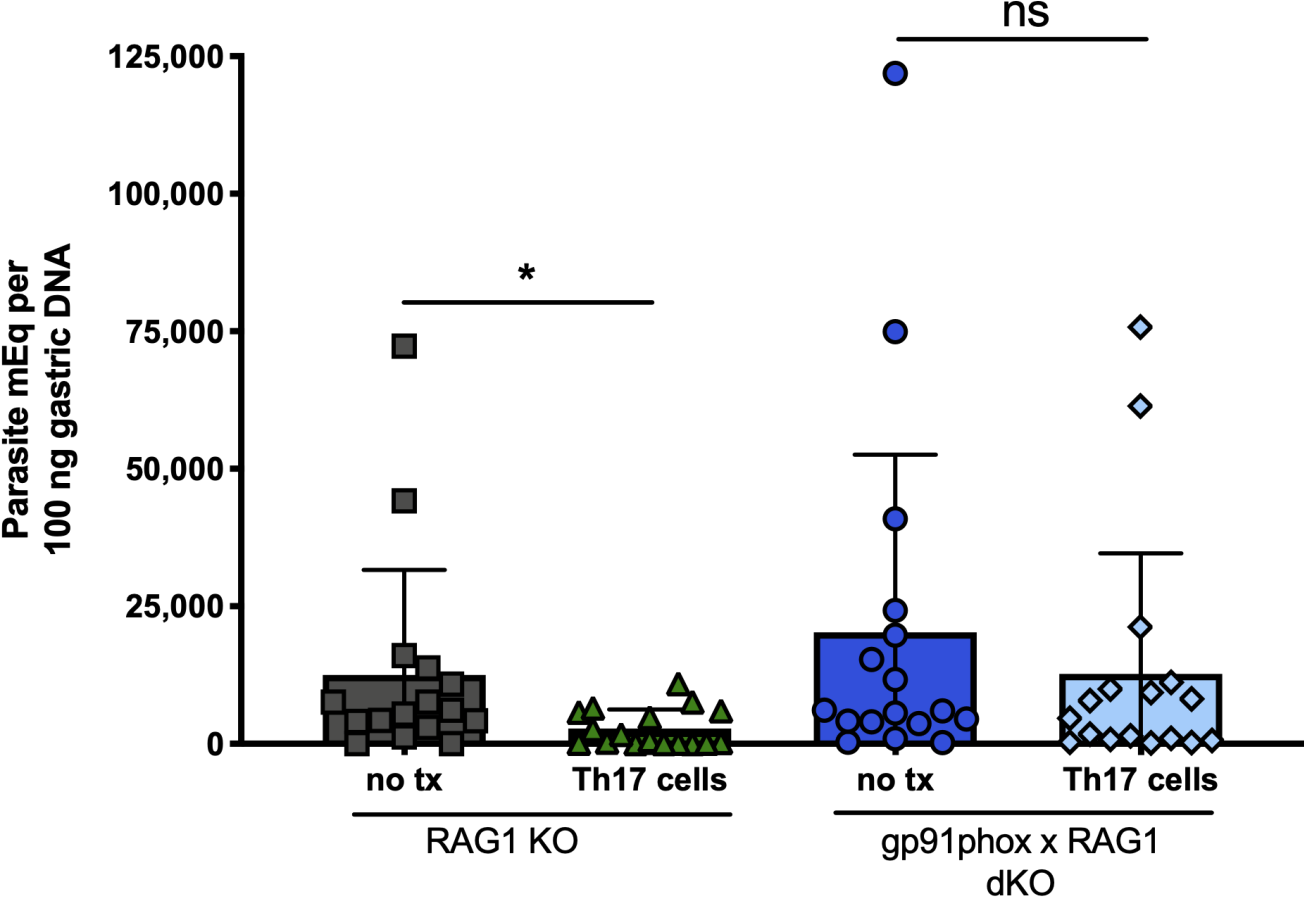

Supplemental Figure 1

WT BALB/c

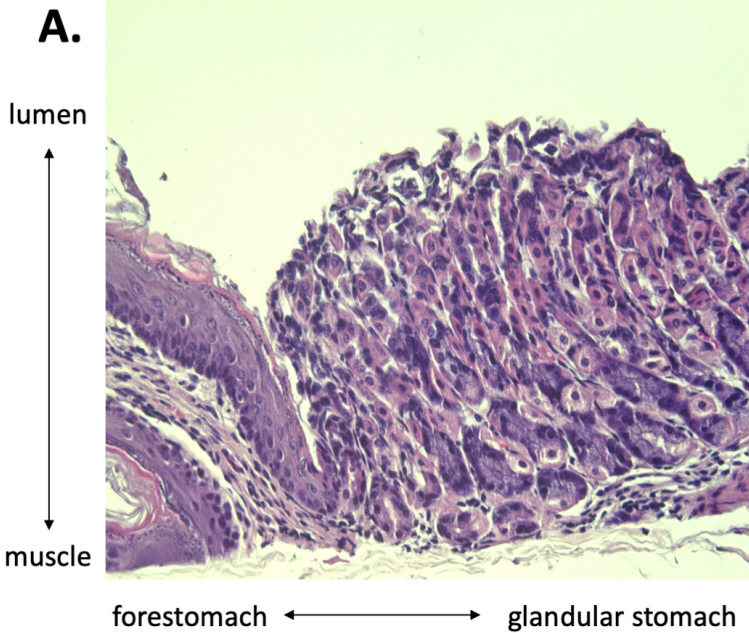

IL-17RA KO

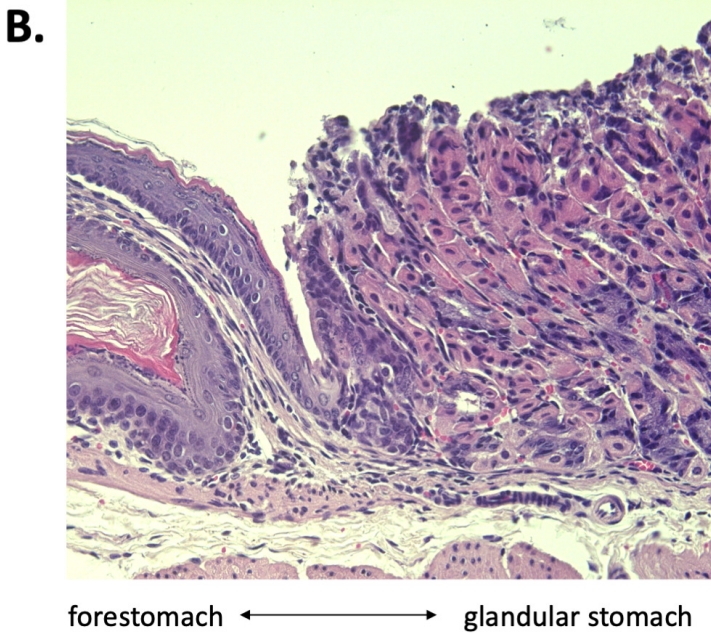

## Supplemental Figure 2

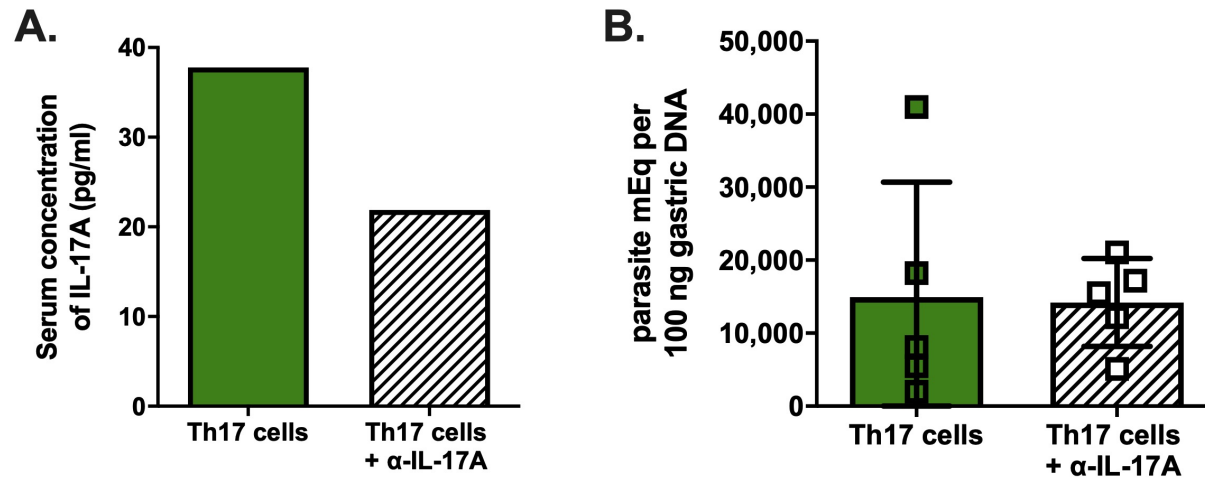

Source: https://www.biorxiv.org/content/10.1101/2020.11.24.397257v1.full.pdf
